# Supplementary material for: Long-term Safety of Treatment with Autologous Mesenchymal Stem Cells in Patients with Radiation-Induced Xerostomia: Primary Results of the MESRIX Phase I/II Randomized Trial
Source: PubMed Central journal article supplement — Clin Cancer Res. 2022 Apr 29;28(13):2890–7. doi: 10.1158/1078-0432.CCR-21-4520 (PMC9365378; doi:10.1158/1078-0432.ccr-21-4520), 2022-04-29
Supplement: ccr-21-4520_supplementary_data_suppsd.pdf [file ccr-21-4520_supplementary_data_suppsd.pdf]

**Visual Analog Scale (VAS)**

**(1) Rate the difficulty you experience in speaking due to dryness (DIFSPK)**

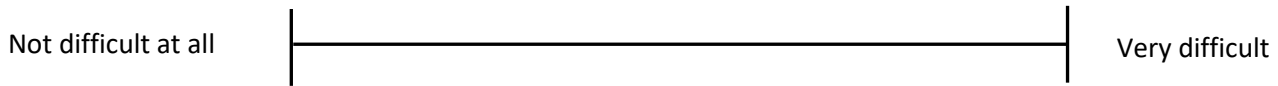

**(2) Rate the difficulty you experience in swallowing due to dryness (DIFSWL)**

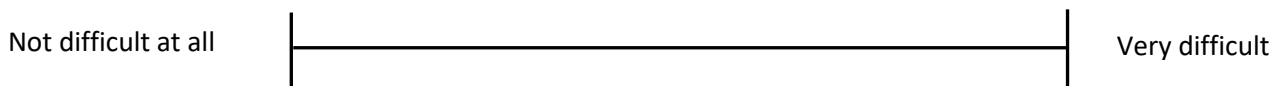

**(3) Rate how much saliva is in your mouth (SALMOU)**

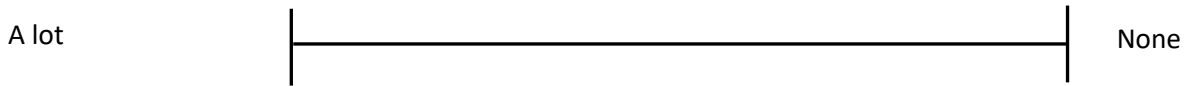

**(4) Rate the dryness of your mouth (DRYMOU)**

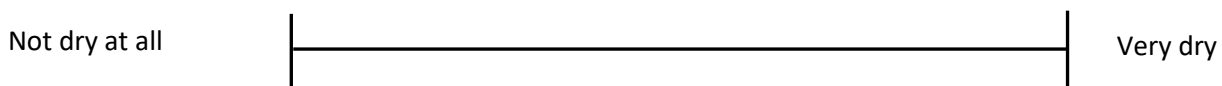

**(5) Rate the dryness of your throat (DRYTHR)**

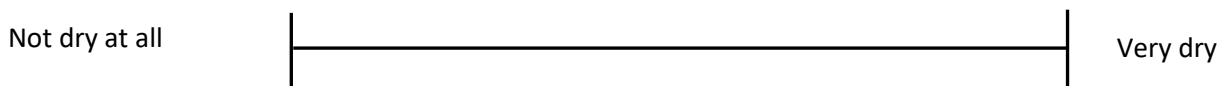

**(6) Rate the dryness of your lips (DRYLIP)**

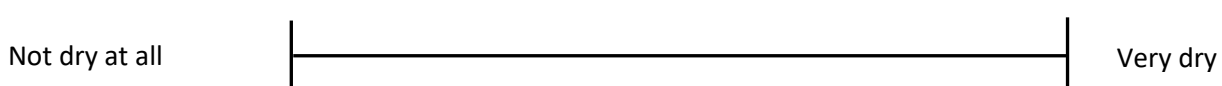

**(7) Rate the dryness of your tongue (DRYTNG)**

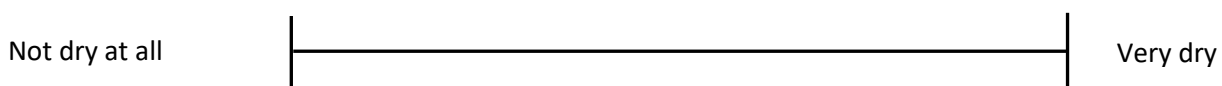

**(8) Rate the level of your thirst (LVLTHR)**

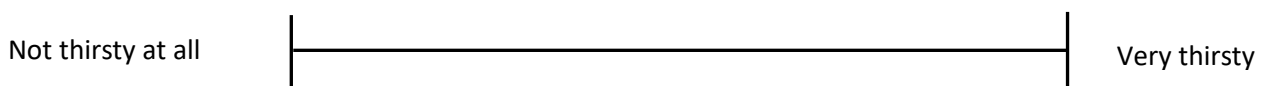

## Xerostomia Questionnaire (XQ)

1. Rate your difficulty in talking due to dryness

**No problems**      0   1   2   3   4   5   6   7   8   9   10   **Could not be worse**

2. Rate your difficulty in chewing due to dryness

**No problems**      0   1   2   3   4   5   6   7   8   9   10   **Could not be worse**

3. Rate your difficulty in swallowing solid food due to dryness

**No problems**      0   1   2   3   4   5   6   7   8   9   10   **Could not be worse**

4. Rate the frequency of your sleeping problems due to dryness

**No problems**      0   1   2   3   4   5   6   7   8   9   10   **Could not be worse**

5. Rate your mouth or throat dryness when eating food

**No problems**      0   1   2   3   4   5   6   7   8   9   10   **Could not be worse**

6. Rate your mouth or throat dryness while not eating

**No problems**      0   1   2   3   4   5   6   7   8   9   10   **Could not be worse**

7. Rate the frequency of sipping liquids to aid swallowing food

**Never** 0   1   2   3   4   5   6   7   8   9   10   **Always**

8. Rate the frequency of sipping liquids for oral comfort when not eating

**Never** 0   1   2   3   4   5   6   7   8   9   10   **Always**
